# Supplementary material for: Discovering of ultrasound-derived fat fraction as a non-invasive and efficient identification for nonalcoholic fatty liver disease
Source: Research Square preprint supplement (doi:10.21203/rs.3.rs-5663482/v1), 2025-04-14
Supplement: Supplementary file 1 [file 5e2b65da1e6441db577cd731.docx]

Additional Table.1 UDFF was used as the diagnostic standard

| Characteristics | HC(46) | MASLD (57) | *P* |
| --- | --- | --- | --- |
| Age, years, medians(IQR) | 28(25.00, 35.5) | 34(28.00, 40) | 0.017 |
| Male, n (%) | 12(26.1) | 43(76.4) | <0.001 |
| BMI, medians(IQR) | 21.80(20.14,23.03) | 27.04(24.69,29.75) | <0.001 |
| CAP(dB/m), medians(IQR) | 214.00  (179.50,234.50) | 290.00  (261.50,331.25) | <0.001 |
| Smoke, n (%) | 5(10.9) | 7(12.3) | 0.824 |
| Drink, n (%) | 6(13.0) | 8(14.0) | 0.884 |
| TC(mmol/L) ,medians(IQR) | 4.46(4.01,5.04) | 4.99(4.56,5.43) | 0.001 |
| TG(mmol/L) , medians(IQR) | 0.84(0.63,1.34) | 1.65(1.33,2.46) | <0.001 |
| HDL, medians(IQR) | 1.23(1.14,1.41) | 1.08(0.93,1.22) | 0.001 |
| LDL, medians(IQR) | 2.86(2.47,3.33) | 3.32(3.02,3.78) | <0.001 |
| FBG, medians(IQR) | 4.55(4.31,4.92) | 4.80(4.53,5.33) | 0.003 |
| ALT(U/L), medians(IQR) | 13.80(11.55,20.00) | 33.20(23.05,57.75) | <0.001 |
| AST(U/L), medians(IQR) | 19.40(17.05,22.25) | 25.70(21.50,38.05) | <0.001 |
| FIB-4 | 0.63(0.50,0.92) | 0.71(0.49,0.97) | 0.745 |
| APRI | 0.24(0.19,0.29) | 0.33(0.25,0.55) | <0.001 |
| APOB | 0.89(0.70,1.12) | 1.13(1.04,1.28) | <0.001 |

HC, healthy controls; MASLD, metabolic dysfunction-associated steatotic liver disease; BMI, body mass index; UDFF, ultrasound derived fat fraction; CAP, controlled attenuation parameter; TC, total cholesterol; TGs, triglycerides; HDL, high-density lipoprotein; LDL, low-density lipoprotein; FBG, fasting blood glucose; ALT, alanine aminotransferase; AST, aspartate aminotransferase; FIB-4, fibrosis index based on the 4 factors; APRI, AST-to-PLT ratio index; APOB, Apolipoprotein B;

Additional Table.2 CAP was used as the diagnostic standard

| Characteristics | HC(49) | MASLD (54) | *P* |
| --- | --- | --- | --- |
| Age, years, medians(IQR) | 30(25.00, 36.00) | 33(28.00, 40.75) | 0.047 |
| Male, n (%) | 16(34.0) | 39(69.6) | <0.001 |
| BMI, medians(IQR) | 21.88(20.17,23.4) | 27.625(24.12,29.3) | <0.001 |
| UDFF(%), medians(IQR) | 3.50(2.96,4.00) | 11.50(7.13,17.13) | <0.001 |
| Smoke, n (%) | 4(8.5) | 8(14.3) | 0.363 |
| Drink, n (%) | 5(10.6) | 9(16.1) | 0.423 |
| TG(mmol/L) , medians(IQR) | 0.88(0.61,1.46) | 1.60(1.25,2.43) | <0.001 |
| TC(mmol/L) ,medians(IQR) | 4.45(4.00,5.00) | 5.04(4.60,5.56) | <0.001 |
| HDL, medians(IQR) | 1.24(1.11,1.42) | 1.11(0.93,1.20) | 0.001 |
| LDL, medians(IQR) | 2.85(2.46,3.30) | 3.34(3.03,3.87) | <0.001 |
| FBG, medians(IQR) | 4.54(4.32,4.89) | 4.80(4.57,5.30) | 0.003 |
| ALT(U/L), medians(IQR) | 16.90(11.80,21.0) | 33.10(20.50,57.20) | <0.001 |
| AST(U/L), medians(IQR) | 20.20(17.08,22.5) | 25.75(20.80,38.38) | <0.001 |
| FIB-4 | 0.61(0.49,0.91) | 0.72(0.49,0.97) | 0.578 |
| APRI | 0.24(0.19,0.30) | 0.33(0.25,0.54) | 0.001 |
| APOB | 0.88(0.70,1.10) | 1.13(1.05,1.28) | <0.001 |

HC, healthy controls; MASLD, metabolic dysfunction-associated steatotic liver disease; BMI, body mass index; UDFF, ultrasound derived fat fraction; CAP, controlled attenuation parameter; TC, total cholesterol; TGs, triglycerides; HDL, high-density lipoprotein; LDL, low-density lipoprotein; FBG, fasting blood glucose; ALT, alanine aminotransferase; AST, aspartate aminotransferase; FIB-4, fibrosis index based on the 4 factors; APRI, AST-to-PLT ratio index; APOB, Apolipoprotein B;

Additional Table 3 Histologic and Imaging Characteristics

| Characteristic | Value |
| --- | --- |
| PDFF-Grade |  |
| 0, <5% | 49/103 (47.57%) |
| 1,5%-10% | 18/103(17.48%) |
| 2,10%-25% | 30/103(29.13%) |
| 3,>25% | 6/103(5.83%) |
| UDFF- Grade |  |
| 0, <5% | 46/103 (44.66%) |
| 1,5%-10% | 25/103 (24.25%) |
| 2,10%-25% | 31/103 (31.30%) |
| 3,>25% | 1/103 (0.97%) |
| CAP-Grade |  |
| 0, 0-238 | 46/103 (44.66%) |
| 1, 238-259 | 9/103 (8.74%) |
| 2, 259-292 | 21/103 (20.39%) |
| 3, >292 | 27/103 (26.21%) |
| MRI-PDFF |  |
| IQR | 5.44% (2.13%, 13.43%) |
| Range | 0.57-47.13 |
| UDFFmean |  |
| IQR | 6% (3.5%, 12.5%) |
| Range | 2-28.67 |
| CAP(dB/m) |  |
| IQR | 246 (214, 295) |
| Range | 138-360 |

; Diagnostic effectiveness of UDFF Diagnostic effectiveness of UDFF Diagnostic effectiveness of UDFF ;;;; Diagnostic effectiveness of UDFF Diagnostic effectiveness of UDFF Diagnostic effectiveness of UDFF Diagnostic effectiveness of UDFF Diagnostic effectiveness of UDFF Diagnostic effectiveness of UDFF Diagnostic effectiveness of UDFF Diagnostic effectiveness of UDFF Diagnostic effectiveness of UDFF Diagnostic effectiveness of UDFF PDFF, Proton Density Fat Fraction; UDFF, ultrasound derived fat fraction; CAP, controlled attenuation parameter; MRI-PDFF, **;**DFF, ultrasound derived fat fraction;

| Additional Table 4. Diagnostic effectiveness of CAP | | | | | | | | | |
| --- | --- | --- | --- | --- | --- | --- | --- | --- | --- |
| CAP | MRI-PDFF | |  | sensitivity | specificity | Yoden index | coincidence rate | κ | *P* |
| HC | MASLD |  |
| HC | 41 | 6 | 47 | 0.889 | 0.837 | 0.726 | 0.774 | 0.727 | <0.001 |
| MASLD | 8 | 48 | 56 |
|  | 49 | 54 | 103 |

HC, healthy controls; MASLD, metabolic dysfunction-associated steatotic liver disease; CAP, controlled attenuation parameter; MRI-PDFF, Magnetic Resonance Imaging - Proton Density Fat Fraction;

| Additional Table 5. Diagnostic effectiveness of UDFF | | | | | | | | | |
| --- | --- | --- | --- | --- | --- | --- | --- | --- | --- |
| UDFF | MRI-PDFF | |  |  |  |  |  |  |  |
| HC | MASLD |  | sensitivity | specificity | Yoden index | coincidence rate | κ | *P* |
| HC | 43 | 3 | 46 | 0.944 | 0.878 | 0.822 | 0.85 | 0.824 | <0.001 |
| MASLD | 6 | 51 | 57 |
|  | 49 | 54 | 103 |

HC, healthy controls; MASLD, metabolic dysfunction-associated steatotic liver disease; UDFF, ultrasound derived fat fraction; MRI-PDFF, Magnetic Resonance Imaging - Proton Density Fat Fraction;

Additional Table6. Relationship between UDFF values and clinical parameters

| variables | correlation coefficient | p |
| --- | --- | --- |
| BMI | 0.735 | <0.001 |
| WBC | 0.327 | 0.001 |
| RBC | 0.504 | <0.001 |
| Neu | 0.264 | 0.007 |
| Lym | 0.139 | 0.16 |
| Plt | -0.42 | 0.670 |
| Hb | 0.466 | <0.001 |
| PT | -0.369 | <0.001 |
| APTT | -0.209 | 0.035 |
| PTA | 0.369 | <0.001 |
| INR | -0.374 | <0.001 |
| TG | 0.616 | <0.001 |
| TC | 0.293 | 0.003 |
| AST | 0.554 | <0.001 |
| ALT | 0.630 | <0.001 |
| GGTUL | 0.671 | <0.001 |
| TB μmol L | 0.128 | 0.198 |
| DB μmol/L | 0.081 | 0.413 |
| IB μmol/L | 0.150 | 0.131 |
| ALP U/L | 0.275 | 0.005 |
| ALB g/L | 0.194 | 0.052 |
| Cr μmol/L | 0.306 | 0.002 |
| BUN mmol/L | 0.012 | 0.901 |
| GLU mmol/L | 0.381 | <0.001 |
| HDL mmol/L | -0.373 | <0.001 |
| LDL mmol/L | 0.339 | <0.001 |
| APOA1 g/L | -0.186 | 0.062 |
| APOB g/L | 0.455 | <0.001 |
| UA μmol/L | 0.486 | <0.001 |
| TBA μmol/L | -0.089 | 0.373 |
| GLU mmol/L | 0.357 | <0.001 |
| HbA1c | 0.395 | <0.001 |
| INS pmol/L | 0.590 | <0.001 |

A positive coefficient is a positive correlation and a negative coefficient is a negative correlation.

BMI, body mass index; WBC, white blood cell count; RBC, red blood cell count; Neu, neutrophil; Lym, lymphocyte; Plt, platelet count; Hb, hemoglobin; PT, prothrombin time; APTT, activated partial thromboplastin time; PTA, prothrombin time activity; INR, international normalized ratio; TG, triglycerides; TC, total cholesterol; AST, aspartate aminotransferase; ALT, alanine aminotransferase; GGTUL, gamma-glutamyl transferase; TB, total bilirubin; DB, direct bilirubin; IB, indirect bilirubin; ALP, alkaline phosphatase; ALB, albumin; Cr, creatinine; BUN, blood urea nitrogen; GLU, glucose; HDL, high-density lipoprotein cholesterol; LDL, low-density lipoprotein cholesterol; APOA, apolipoprotein a; APOB, apolipoprotein b; UA, uric acid; TBA, total bile acids; HbA1c, glycated hemoglobin A1c; INS, Insulin;

Additional Table7. Area under the curve for Udff and CAP. (A cut-off value of 10% of pdff was used for classification)

| Index | AUC | Threshold value | P value | Sensitivity (%) | Specificity (%) | 95% CI |
| --- | --- | --- | --- | --- | --- | --- |
| Udffmean | 0.970 | 7.67 | <0.001 | 97.2 | 88.1 | 0.942-0.997 |
| CAP | 0.922 | 250.50 | <0.001 | 94.4 | 76.1 | 0.860-0.983 |

UDFF, ultrasound derived fat fraction; CAP, controlled attenuation parameter; AUC, receiver Operating Characteristic curve; UDFFmean, the AUC of the mean from six UDFF;

Additional Table8. Area under the curve for Udff and CAP. (A cut-off value of 25% of pdff was used for classification)

| Index | AUC | Threshold value | P value | Sensitivity (%) | Specificity (%) | 95% CI |
| --- | --- | --- | --- | --- | --- | --- |
| Udffmean | 0.982 | 16.92 | <0.001 | 100 | 91.8 | 0.954-1.000 |
| CAP | 0.952 | 331.50 | <0.001 | 100 | 91.8 | 0.909-0.995 |

UDFF, ultrasound derived fat fraction; CAP, controlled attenuation parameter; AUC, receiver Operating Characteristic curve; UDFFmean, the AUC of the mean from six UDFF;
